# Supplementary material for: Bioinformatics and Computational Tools for Next-Generation Sequencing Analysis in Clinical Genetics
Source: PubMed Central journal article supplement (PMC7019349; doi:10.3390/jcm9010132), 2020-01-03
Supplement: jcm-09-00132-s001.pdf [file jcm-09-00132-s001.pdf]

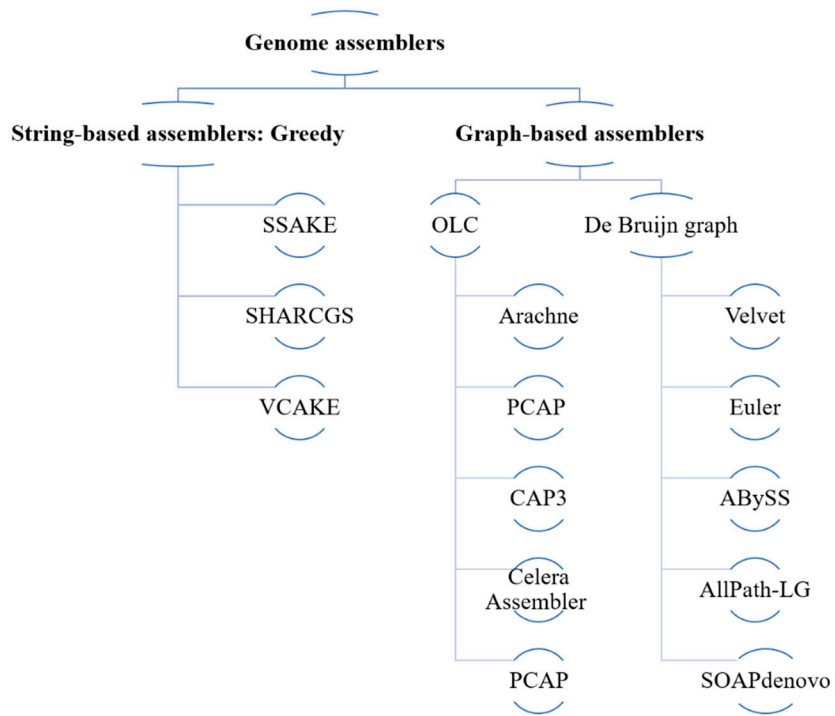

**Figure S1.** Summary of the tree main genome assemblers' methods and the most widely used software that applies each method.
